# Supplementary material for: A comparative study of the capability of MSCs isolated from different human tissue sources to differentiate into neuronal stem cells and dopaminergic-like cells
Source: PeerJ. 2022 Mar 17;10:e13003. doi: 10.7717/peerj.13003 (PMC8944334; doi:10.7717/peerj.13003)
Supplement: Supplemental Information 1 [file peerj-10-13003-s001.xls]

## Sheet: 0
	Well	Fluor	Target	Content	Sample	Biological Set Name	Cq	Cq Mean	Cq Std. Dev	Starting Quantity (SQ)	Log Starting Quantity	SQ Mean	SQ Std. Dev	Set Point	Well Note
	A01	SYBR	FOXA2	Unkn-01	1		24.1547	24.1819	0.0261997					62.4
	A02	SYBR	FOXA2	Unkn-01	1		24.207	24.1819	0.0261997					62.4
	A03	SYBR	FOXA2	Unkn-01	1		24.184	24.1819	0.0261997					62.4
	A04	SYBR	FOXA2	Unkn-02	2		23.8563	23.7895	0.139287					62.4
	A05	SYBR	FOXA2	Unkn-02	2		23.8827	23.7895	0.139287					62.4
	A06	SYBR	FOXA2	Unkn-02	2		23.6294	23.7895	0.139287					62.4
	A07	SYBR	FOXA2	Unkn-03	3		25.104	25.159	0.0634528					62.4
	A08	SYBR	FOXA2	Unkn-03	3		25.1447	25.159	0.0634528					62.4
	A09	SYBR	FOXA2	Unkn-03	3		25.2284	25.159	0.0634528					62.4
	A10	SYBR	FOXA2	Unkn-04	4		23.5116	23.4895	0.0622599					62.4
	A11	SYBR	FOXA2	Unkn-04	4		23.4192	23.4895	0.0622599					62.4
	A12	SYBR	FOXA2	Unkn-04	4		23.5377	23.4895	0.0622599					62.4
	B01	SYBR	FOXA2	Unkn-05	5		25.1807	25.0035	0.211695					62.4
	B02	SYBR	FOXA2	Unkn-05	5		25.0607	25.0035	0.211695					62.4
	B03	SYBR	FOXA2	Unkn-05	5		24.7691	25.0035	0.211695					62.4
	B04	SYBR	FOXA2	Unkn-06	6		25.0864	24.9537	0.120736					62.4
	B05	SYBR	FOXA2	Unkn-06	6		24.9243	24.9537	0.120736					62.4
	B06	SYBR	FOXA2	Unkn-06	6		24.8503	24.9537	0.120736					62.4
	B07	SYBR	FOXA2	Unkn-07	7		25.0583	25.0165	0.0517333					62.4
	B08	SYBR	FOXA2	Unkn-07	7		25.0325	25.0165	0.0517333					62.4
	B09	SYBR	FOXA2	Unkn-07	7		24.9587	25.0165	0.0517333					62.4
	B10	SYBR	FOXA2	Unkn-08	8		24.0538	24.1849	0.432353					62.4
	B11	SYBR	FOXA2	Unkn-08	8		23.8334	24.1849	0.432353					62.4
	B12	SYBR	FOXA2	Unkn-08	8		24.6677	24.1849	0.432353					62.4
	C01	SYBR	FOXA2	Unkn-09	9		24.7421	24.7785	0.0320141					62.4
	C02	SYBR	FOXA2	Unkn-09	9		24.8022	24.7785	0.0320141					62.4
	C03	SYBR	FOXA2	Unkn-09	9		24.7913	24.7785	0.0320141					62.4
	C04	SYBR	FOXA2	Unkn-10	10		25.3976	25.3879	0.0287602					62.4
	C05	SYBR	FOXA2	Unkn-10	10		25.3555	25.3879	0.0287602					62.4
	C06	SYBR	FOXA2	Unkn-10	10		25.4105	25.3879	0.0287602					62.4
	C07	SYBR	FOXA2	Unkn-11	11		25.5692	25.438	0.150314					62.4
	C08	SYBR	FOXA2	Unkn-11	11		25.471	25.438	0.150314					62.4
	C09	SYBR	FOXA2	Unkn-11	11		25.274	25.438	0.150314					62.4
	C10	SYBR	FOXA2	Unkn-12	12		25.3732	25.2601	0.107073					62.4
	C11	SYBR	FOXA2	Unkn-12	12		25.1604	25.2601	0.107073					62.4
	C12	SYBR	FOXA2	Unkn-12	12		25.2465	25.2601	0.107073					62.4
	D01	SYBR	FOXA2	Unkn-13	14		24.7544	24.7162	0.0459443					62.4
	D02	SYBR	FOXA2	Unkn-13	14		24.6652	24.7162	0.0459443					62.4
	D03	SYBR	FOXA2	Unkn-13	14		24.7289	24.7162	0.0459443					62.4
	D04	SYBR	FOXA2	Unkn-14	15		25.2977	25.3177	0.0520143					62.4
	D05	SYBR	FOXA2	Unkn-14	15		25.2787	25.3177	0.0520143					62.4
	D06	SYBR	FOXA2	Unkn-14	15		25.3767	25.3177	0.0520143					62.4
	D07	SYBR	FOXA2	Unkn-15	16		25.3438	25.2873	0.0490322					62.4
	D08	SYBR	FOXA2	Unkn-15	16		25.2562	25.2873	0.0490322					62.4
	D09	SYBR	FOXA2	Unkn-15	16		25.2618	25.2873	0.0490322					62.4
	D10	SYBR	FOXA2	NTC				0	0			0	0	62.4
	D11	SYBR	FOXA2	NTC				0	0			0	0	62.4
	D12	SYBR	FOXA2	NTC				0	0			0	0	62.4
	E01	SYBR	GAPDH	Unkn-17	1		17.2463	17.2233	0.0698675					62.4
	E02	SYBR	GAPDH	Unkn-17	1		17.1448	17.2233	0.0698675					62.4
	E03	SYBR	GAPDH	Unkn-17	1		17.2787	17.2233	0.0698675					62.4
	E04	SYBR	GAPDH	Unkn-18	2		17.9052	17.8898	0.132043					62.4
	E05	SYBR	GAPDH	Unkn-18	2		18.0135	17.8898	0.132043					62.4
	E06	SYBR	GAPDH	Unkn-18	2		17.7508	17.8898	0.132043					62.4
	E07	SYBR	GAPDH	Unkn-19	3		18.1354	18.1387	0.0414916					62.4
	E08	SYBR	GAPDH	Unkn-19	3		18.1818	18.1387	0.0414916					62.4
	E09	SYBR	GAPDH	Unkn-19	3		18.099	18.1387	0.0414916					62.4
	E10	SYBR	GAPDH	Unkn-20	4		17.7675	17.7687	0.0194313					62.4
	E11	SYBR	GAPDH	Unkn-20	4		17.7887	17.7687	0.0194313					62.4
	E12	SYBR	GAPDH	Unkn-20	4		17.7499	17.7687	0.0194313					62.4
	F01	SYBR	GAPDH	Unkn-21	5		18.3306	18.4314	0.0952448					62.4
	F02	SYBR	GAPDH	Unkn-21	5		18.5199	18.4314	0.0952448					62.4
	F03	SYBR	GAPDH	Unkn-21	5		18.4438	18.4314	0.0952448					62.4
	F04	SYBR	GAPDH	Unkn-22	6		19.6784	19.7893	0.104165					62.4
	F05	SYBR	GAPDH	Unkn-22	6		19.8851	19.7893	0.104165					62.4
	F06	SYBR	GAPDH	Unkn-22	6		19.8045	19.7893	0.104165					62.4
	F07	SYBR	GAPDH	Unkn-23	7		17.3272	17.2322	0.0823448					62.4
	F08	SYBR	GAPDH	Unkn-23	7		17.1843	17.2322	0.0823448					62.4
	F09	SYBR	GAPDH	Unkn-23	7		17.185	17.2322	0.0823448					62.4
	F10	SYBR	GAPDH	Unkn-24	8		18.2074	18.2429	0.0688941					62.4
	F11	SYBR	GAPDH	Unkn-24	8		18.199	18.2429	0.0688941					62.4
	F12	SYBR	GAPDH	Unkn-24	8		18.3223	18.2429	0.0688941					62.4
	G01	SYBR	GAPDH	Unkn-25	9		17.6746	17.7196	0.0809812					62.4
	G02	SYBR	GAPDH	Unkn-25	9		17.6711	17.7196	0.0809812					62.4
	G03	SYBR	GAPDH	Unkn-25	9		17.8131	17.7196	0.0809812					62.4
	G04	SYBR	GAPDH	Unkn-26	10		17.9039	17.7988	0.105283					62.4
	G05	SYBR	GAPDH	Unkn-26	10		17.7993	17.7988	0.105283					62.4
	G06	SYBR	GAPDH	Unkn-26	10		17.6933	17.7988	0.105283					62.4
	G07	SYBR	GAPDH	Unkn-27	11		18.515	18.5717	0.0495644					62.4
	G08	SYBR	GAPDH	Unkn-27	11		18.5931	18.5717	0.0495644					62.4
	G09	SYBR	GAPDH	Unkn-27	11		18.6069	18.5717	0.0495644					62.4
	G10	SYBR	GAPDH	Unkn-28	12		18.2261	18.3117	0.155156					62.4
	G11	SYBR	GAPDH	Unkn-28	12		18.2182	18.3117	0.155156					62.4
	G12	SYBR	GAPDH	Unkn-28	12		18.4908	18.3117	0.155156					62.4
	H01	SYBR	GAPDH	Unkn-29	14		18.7772	18.5906	0.168231					62.4
	H02	SYBR	GAPDH	Unkn-29	14		18.5442	18.5906	0.168231					62.4
	H03	SYBR	GAPDH	Unkn-29	14		18.4505	18.5906	0.168231					62.4
	H04	SYBR	GAPDH	Unkn-30	15		17.0738	17.0917	0.0867769					62.4
	H05	SYBR	GAPDH	Unkn-30	15		17.0152	17.0917	0.0867769					62.4
	H06	SYBR	GAPDH	Unkn-30	15		17.186	17.0917	0.0867769					62.4
	H07	SYBR	GAPDH	Unkn-31	16		16.5871	16.611	0.0478746					62.4
	H08	SYBR	GAPDH	Unkn-31	16		16.5799	16.611	0.0478746					62.4
	H09	SYBR	GAPDH	Unkn-31	16		16.6662	16.611	0.0478746					62.4
	H10	SYBR	GAPDH	NTC			38.602	38.602	0				0	62.4
	H11	SYBR	GAPDH	NTC			36.9652	36.9652	0				0	62.4
	H12	SYBR	GAPDH	NTC			37.7769	37.7769	0				0	62.4

## Sheet: Run Information
File Name	FOXA2 GAPDH .. S RUN 2.pcrd
Created By User	admin
Notes
ID
Run Started	08/04/2020 10:32:18 UTC
Run Ended	08/04/2020 11:38:10 UTC
Sample Vol	10
Lid Temp	105
Protocol File Name	FOXA2 GAPDH RUN.prcl
Plate Setup File Name	Quick Plate_96 wells_SYBR Only.pltd
Base Serial Number	CT016590
Optical Head Serial Number	785BR12279
CFX Maestro Version	4.0.2325.0418.
