# Supplementary material for: A comparative study of the capability of MSCs isolated from different human tissue sources to differentiate into neuronal stem cells and dopaminergic-like cells
Source: PeerJ. 2022 Mar 17;10:e13003. doi: 10.7717/peerj.13003 (PMC8944334; doi:10.7717/peerj.13003)
Supplement: Supplemental Information 2 [file peerj-10-13003-s002.xls]

## Sheet: 0
	Well	Fluor	Target	Content	Sample	Biological Set Name	Cq	Cq Mean	Cq Std. Dev	Starting Quantity (SQ)	Log Starting Quantity	SQ Mean	SQ Std. Dev	Set Point	Well Note
	A01	SYBR	LMX1A	Unkn-01	1			0	0			0	0	62.4
	A02	SYBR	LMX1A	Unkn-01	1		21.3555	21.471	0.163295					62.4
	A03	SYBR	LMX1A	Unkn-01	1		21.5865	21.471	0.163295					62.4
	A04	SYBR	LMX1A	Unkn-02	2		27.4381	23.5643	3.35541					62.4
	A05	SYBR	LMX1A	Unkn-02	2		21.5624	23.5643	3.35541					62.4
	A06	SYBR	LMX1A	Unkn-02	2		21.6924	23.5643	3.35541					62.4
	A07	SYBR	LMX1A	Unkn-03	3		23.3979	23.6044	0.198823					62.4
	A08	SYBR	LMX1A	Unkn-03	3		23.6205	23.6044	0.198823					62.4
	A09	SYBR	LMX1A	Unkn-03	3		23.7946	23.6044	0.198823					62.4
	A10	SYBR	LMX1A	Unkn-04	4		21.029	21.2351	0.288621					62.4
	A11	SYBR	LMX1A	Unkn-04	4		21.1114	21.2351	0.288621					62.4
	A12	SYBR	LMX1A	Unkn-04	4		21.565	21.2351	0.288621					62.4
	B01	SYBR	LMX1A	Unkn-05	5		23.7725	23.4978	0.254962					62.4
	B02	SYBR	LMX1A	Unkn-05	5		23.4521	23.4978	0.254962					62.4
	B03	SYBR	LMX1A	Unkn-05	5		23.2688	23.4978	0.254962					62.4
	B04	SYBR	LMX1A	Unkn-06	6		23.2919	22.814	0.420477					62.4
	B05	SYBR	LMX1A	Unkn-06	6		22.6497	22.814	0.420477					62.4
	B06	SYBR	LMX1A	Unkn-06	6		22.5005	22.814	0.420477					62.4
	B07	SYBR	LMX1A	Unkn-07	7		22.3679	22.3683	0.162974					62.4
	B08	SYBR	LMX1A	Unkn-07	7		22.5315	22.3683	0.162974					62.4
	B09	SYBR	LMX1A	Unkn-07	7		22.2056	22.3683	0.162974					62.4
	B10	SYBR	LMX1A	Unkn-08	8		22.2815	23.9692	2.97201					62.4
	B11	SYBR	LMX1A	Unkn-08	8		27.4008	23.9692	2.97201					62.4
	B12	SYBR	LMX1A	Unkn-08	8		22.2252	23.9692	2.97201					62.4
	C01	SYBR	LMX1A	Unkn-09	9		25.7545	24.6568	1.4759					62.4
	C02	SYBR	LMX1A	Unkn-09	9		25.2368	24.6568	1.4759					62.4
	C03	SYBR	LMX1A	Unkn-09	9		22.979	24.6568	1.4759					62.4
	C04	SYBR	LMX1A	Unkn-10	10		22.8761	23.0155	0.141283					62.4
	C05	SYBR	LMX1A	Unkn-10	10		23.1586	23.0155	0.141283					62.4
	C06	SYBR	LMX1A	Unkn-10	10		23.0118	23.0155	0.141283					62.4
	C07	SYBR	LMX1A	Unkn-11	11		22.2943	22.4709	0.180649					62.4
	C08	SYBR	LMX1A	Unkn-11	11		22.6553	22.4709	0.180649					62.4
	C09	SYBR	LMX1A	Unkn-11	11		22.463	22.4709	0.180649					62.4
	C10	SYBR	LMX1A	Unkn-12	12		23.0963	23.5711	0.44034					62.4
	C11	SYBR	LMX1A	Unkn-12	12		23.6509	23.5711	0.44034					62.4
	C12	SYBR	LMX1A	Unkn-12	12		23.966	23.5711	0.44034					62.4
	D01	SYBR	LMX1A	Unkn-13	14		23.494	23.323	0.28922					62.4
	D02	SYBR	LMX1A	Unkn-13	14		23.4859	23.323	0.28922					62.4
	D03	SYBR	LMX1A	Unkn-13	14		22.9891	23.323	0.28922					62.4
	D04	SYBR	LMX1A	Unkn-14	15		22.666	22.6338	0.043807					62.4
	D05	SYBR	LMX1A	Unkn-14	15		22.5839	22.6338	0.043807					62.4
	D06	SYBR	LMX1A	Unkn-14	15		22.6514	22.6338	0.043807					62.4
	D07	SYBR	LMX1A	Unkn-15	16		22.6879	22.637	0.146089					62.4
	D08	SYBR	LMX1A	Unkn-15	16		22.4722	22.637	0.146089					62.4
	D09	SYBR	LMX1A	Unkn-15	16		22.7508	22.637	0.146089					62.4
	D10	SYBR	LMX1A	NTC				0	0			0	0	62.4
	D11	SYBR	LMX1A	NTC				0	0			0	0	62.4
	D12	SYBR	LMX1A	NTC				0	0			0	0	62.4
	E01	SYBR	TH	Unkn-16	1		28.8213	28.0971	1.15583					62.4
	E02	SYBR	TH	Unkn-16	1		26.7642	28.0971	1.15583					62.4
	E03	SYBR	TH	Unkn-16	1		28.7059	28.0971	1.15583					62.4
	E04	SYBR	TH	Unkn-17	2		29.1006	26.8484	2.02398					62.4
	E05	SYBR	TH	Unkn-17	2		25.1817	26.8484	2.02398					62.4
	E06	SYBR	TH	Unkn-17	2		26.263	26.8484	2.02398					62.4
	E07	SYBR	TH	Unkn-18	3		25.9435	26.1277	1.53847					62.4
	E08	SYBR	TH	Unkn-18	3		27.75	26.1277	1.53847					62.4
	E09	SYBR	TH	Unkn-18	3		24.6897	26.1277	1.53847					62.4
	E10	SYBR	TH	Unkn-19	4		26.5183	26.8306	0.364615					62.4
	E11	SYBR	TH	Unkn-19	4		27.2313	26.8306	0.364615					62.4
	E12	SYBR	TH	Unkn-19	4		26.7422	26.8306	0.364615					62.4
	F01	SYBR	TH	Unkn-20	5		24.2304	24.5489	0.908331					62.4
	F02	SYBR	TH	Unkn-20	5		23.8428	24.5489	0.908331					62.4
	F03	SYBR	TH	Unkn-20	5		25.5736	24.5489	0.908331					62.4
	F04	SYBR	TH	Unkn-21	6		26.7242	26.0113	0.623037					62.4
	F05	SYBR	TH	Unkn-21	6		25.739	26.0113	0.623037					62.4
	F06	SYBR	TH	Unkn-21	6		25.5708	26.0113	0.623037					62.4
	F07	SYBR	TH	Unkn-22	7		25.0655	25.2823	0.187923					62.4
	F08	SYBR	TH	Unkn-22	7		25.3969	25.2823	0.187923					62.4
	F09	SYBR	TH	Unkn-22	7		25.3847	25.2823	0.187923					62.4
	F10	SYBR	TH	Unkn-23	8		25.0482	25.2441	0.271899					62.4
	F11	SYBR	TH	Unkn-23	8		25.1296	25.2441	0.271899					62.4
	F12	SYBR	TH	Unkn-23	8		25.5545	25.2441	0.271899					62.4
	G01	SYBR	TH	Unkn-24	9		22.9635	22.728	0.230856					62.4
	G02	SYBR	TH	Unkn-24	9		22.7185	22.728	0.230856					62.4
	G03	SYBR	TH	Unkn-24	9		22.5021	22.728	0.230856					62.4
	G04	SYBR	TH	Unkn-25	10		23.5246	23.5258	0.056185					62.4
	G05	SYBR	TH	Unkn-25	10		23.4702	23.5258	0.056185					62.4
	G06	SYBR	TH	Unkn-25	10		23.5826	23.5258	0.056185					62.4
	G07	SYBR	TH	Unkn-26	11		24.2066	24.1476	0.0712894					62.4
	G08	SYBR	TH	Unkn-26	11		24.1678	24.1476	0.0712894					62.4
	G09	SYBR	TH	Unkn-26	11		24.0683	24.1476	0.0712894					62.4
	G10	SYBR	TH	Unkn-27	12		23.4167	23.6088	0.239635					62.4
	G11	SYBR	TH	Unkn-27	12		23.5324	23.6088	0.239635					62.4
	G12	SYBR	TH	Unkn-27	12		23.8773	23.6088	0.239635					62.4
	H01	SYBR	TH	Unkn-28	14		25.3167	25.0729	0.240372					62.4
	H02	SYBR	TH	Unkn-28	14		25.066	25.0729	0.240372					62.4
	H03	SYBR	TH	Unkn-28	14		24.8361	25.0729	0.240372					62.4
	H04	SYBR	TH	Unkn-29	15		26.1019	26.1106	0.0102241					62.4
	H05	SYBR	TH	Unkn-29	15		26.1079	26.1106	0.0102241					62.4
	H06	SYBR	TH	Unkn-29	15		26.1218	26.1106	0.0102241					62.4
	H07	SYBR	TH	Unkn-30	16		26.2183	26.1899	0.100535					62.4
	H08	SYBR	TH	Unkn-30	16		26.0783	26.1899	0.100535					62.4
	H09	SYBR	TH	Unkn-30	16		26.2732	26.1899	0.100535					62.4
	H10	SYBR	TH	NTC			34.3247	34.3247	0				0	62.4
	H11	SYBR	TH	NTC				0	0			0	0	62.4
	H12	SYBR	TH	NTC				0	0			0	0	62.4

## Sheet: Run Information
File Name	LMX TH RUN .prcl.pcrd
Created By User	admin
Notes
ID
Run Started	07/27/2020 08:57:30 UTC
Run Ended	07/27/2020 10:03:33 UTC
Sample Vol	10
Lid Temp	105
Protocol File Name	FIRST RUN LMX TH.prcl
Plate Setup File Name	LMX1A TH.pltd
Base Serial Number	CT016590
Optical Head Serial Number	785BR12279
CFX Maestro Version	4.0.2325.0418.
