# Supplementary material for: A comparative study of the capability of MSCs isolated from different human tissue sources to differentiate into neuronal stem cells and dopaminergic-like cells
Source: PeerJ. 2022 Mar 17;10:e13003. doi: 10.7717/peerj.13003 (PMC8944334; doi:10.7717/peerj.13003)
Supplement: Supplemental Information 3 [file peerj-10-13003-s003.xls]

## Sheet: 0
	Well	Fluor	Target	Content	Sample	Biological Set Name	Cq	Cq Mean	Cq Std. Dev	Starting Quantity (SQ)	Log Starting Quantity	SQ Mean	SQ Std. Dev	Set Point	Well Note
	A01	SYBR	LMX1A	Unkn-01	C1-04		33.2998	33.4	0.119651					62.4
	A02	SYBR	LMX1A	Unkn-01	C1-04		33.3678	33.4	0.119651					62.4
	A03	SYBR	LMX1A	Unkn-01	C1-04		33.5325	33.4	0.119651					62.4
	A04	SYBR	LMX1A	Unkn-02	C10-03			0	0			0	0	62.4
	A05	SYBR	LMX1A	Unkn-02	C10-03		34.2015	34.2015	0				0	62.4
	A06	SYBR	LMX1A	Unkn-02	C10-03			0	0			0	0	62.4
	A07	SYBR	LMX1A	Unkn-03	AT3-8		29.1848	29.8663	0.591413					62.4
	A08	SYBR	LMX1A	Unkn-03	AT3-8		30.2446	29.8663	0.591413					62.4
	A09	SYBR	LMX1A	Unkn-03	AT3-8		30.1696	29.8663	0.591413					62.4
	A10	SYBR	LMX1A	Unkn-04	AT14-12		29.6096	30.0819	0.416001					62.4
	A11	SYBR	LMX1A	Unkn-04	AT14-12		30.3939	30.0819	0.416001					62.4
	A12	SYBR	LMX1A	Unkn-04	AT14-12		30.2421	30.0819	0.416001					62.4
	B01	SYBR	LMX1A	Unkn-05	WJ10-03		29.1859	29.1818	0.0416913					62.4
	B02	SYBR	LMX1A	Unkn-05	WJ10-03		29.1382	29.1818	0.0416913					62.4
	B03	SYBR	LMX1A	Unkn-05	WJ10-03		29.2212	29.1818	0.0416913					62.4
	B04	SYBR	LMX1A	Unkn-06	BM1-1		29.6973	29.6791	0.365481					62.4
	B05	SYBR	LMX1A	Unkn-06	BM1-1		29.3048	29.6791	0.365481					62.4
	B06	SYBR	LMX1A	Unkn-06	BM1-1		30.0351	29.6791	0.365481					62.4
	B07	SYBR	LMX1A	Unkn-07	WJ11-12		31.1859	31.2902	0.179743					62.4
	B08	SYBR	LMX1A	Unkn-07	WJ11-12		31.1869	31.2902	0.179743					62.4
	B09	SYBR	LMX1A	Unkn-07	WJ11-12		31.4977	31.2902	0.179743					62.4
	B10	SYBR	LMX1A	NTC			35.2497	35.2497	0				0	62.4
	B11	SYBR	LMX1A	NTC				0	0			0	0	62.4
	B12	SYBR	LMX1A	NTC				0	0			0	0	62.4
	C01	SYBR	TH	Unkn-09	C1-04			0	0			0	0	62.4
	C02	SYBR	TH	Unkn-09	C1-04			0	0			0	0	62.4
	C03	SYBR	TH	Unkn-09	C1-04			0	0			0	0	62.4
	C04	SYBR	TH	Unkn-10	C10-03			0	0			0	0	62.4
	C05	SYBR	TH	Unkn-10	C10-03			0	0			0	0	62.4
	C06	SYBR	TH	Unkn-10	C10-03			0	0			0	0	62.4
	C07	SYBR	TH	Unkn-11	AT3-8			0	0			0	0	62.4
	C08	SYBR	TH	Unkn-11	AT3-8			0	0			0	0	62.4
	C09	SYBR	TH	Unkn-11	AT3-8		36.5732	36.5732	0				0	62.4
	C10	SYBR	TH	Unkn-12	AT14-12			0	0			0	0	62.4
	C11	SYBR	TH	Unkn-12	AT14-12			0	0			0	0	62.4
	C12	SYBR	TH	Unkn-12	AT14-12			0	0			0	0	62.4
	D01	SYBR	TH	Unkn-13	WJ10-03			0	0			0	0	62.4
	D02	SYBR	TH	Unkn-13	WJ10-03			0	0			0	0	62.4
	D03	SYBR	TH	Unkn-13	WJ10-03			0	0			0	0	62.4
	D04	SYBR	TH	Unkn-14	BM1-1			0	0			0	0	62.4
	D05	SYBR	TH	Unkn-14	BM1-1			0	0			0	0	62.4
	D06	SYBR	TH	Unkn-14	BM1-1			0	0			0	0	62.4
	D07	SYBR	TH	Unkn-15	WJ11-12			0	0			0	0	62.4
	D08	SYBR	TH	Unkn-15	WJ11-12			0	0			0	0	62.4
	D09	SYBR	TH	Unkn-15	WJ11-12		35.9521	35.9521	0				0	62.4
	D10	SYBR	TH	NTC				0	0			0	0	62.4
	D11	SYBR	TH	NTC				0	0			0	0	62.4
	D12	SYBR	TH	NTC				0	0			0	0	62.4
	E01	SYBR	FOXA2	Unkn-17	C1-04		32.6329	33.8744	1.59436					62.4
	E02	SYBR	FOXA2	Unkn-17	C1-04		33.3178	33.8744	1.59436					62.4
	E03	SYBR	FOXA2	Unkn-17	C1-04		35.6724	33.8744	1.59436					62.4
	E04	SYBR	FOXA2	Unkn-18	C10-03		34.012	33.9659	0.358559					62.4
	E05	SYBR	FOXA2	Unkn-18	C10-03		33.5865	33.9659	0.358559					62.4
	E06	SYBR	FOXA2	Unkn-18	C10-03		34.2991	33.9659	0.358559					62.4
	E07	SYBR	FOXA2	Unkn-19	AT3-8		30.3503	30.4479	0.186633					62.4
	E08	SYBR	FOXA2	Unkn-19	AT3-8		30.3304	30.4479	0.186633					62.4
	E09	SYBR	FOXA2	Unkn-19	AT3-8		30.6631	30.4479	0.186633					62.4
	E10	SYBR	FOXA2	Unkn-20	AT14-12		30.8447	30.3855	0.437663					62.4
	E11	SYBR	FOXA2	Unkn-20	AT14-12		29.9731	30.3855	0.437663					62.4
	E12	SYBR	FOXA2	Unkn-20	AT14-12		30.3386	30.3855	0.437663					62.4
	F01	SYBR	FOXA2	Unkn-21	WJ10-03		29.5458	29.3774	0.290929					62.4
	F02	SYBR	FOXA2	Unkn-21	WJ10-03		29.545	29.3774	0.290929					62.4
	F03	SYBR	FOXA2	Unkn-21	WJ10-03		29.0415	29.3774	0.290929					62.4
	F04	SYBR	FOXA2	Unkn-22	BM1-1		30.0439	30.035	0.176323					62.4
	F05	SYBR	FOXA2	Unkn-22	BM1-1		30.2067	30.035	0.176323					62.4
	F06	SYBR	FOXA2	Unkn-22	BM1-1		29.8544	30.035	0.176323					62.4
	F07	SYBR	FOXA2	Unkn-23	WJ11-12		31.9143	31.9727	0.815043					62.4
	F08	SYBR	FOXA2	Unkn-23	WJ11-12		31.1884	31.9727	0.815043					62.4
	F09	SYBR	FOXA2	Unkn-23	WJ11-12		32.8153	31.9727	0.815043					62.4
	F10	SYBR	FOXA2	NTC			32.3162	32.3162	0				0	62.4
	F11	SYBR	FOXA2	NTC				0	0			0	0	62.4
	F12	SYBR	FOXA2	NTC				0	0			0	0	62.4
	G01	SYBR	GAPDH	Unkn-25	C1-04		17.7798	17.8332	0.0749106					62.4
	G02	SYBR	GAPDH	Unkn-25	C1-04		17.801	17.8332	0.0749106					62.4
	G03	SYBR	GAPDH	Unkn-25	C1-04		17.9188	17.8332	0.0749106					62.4
	G04	SYBR	GAPDH	Unkn-26	C10-03		18.4698	18.3852	0.0800468					62.4
	G05	SYBR	GAPDH	Unkn-26	C10-03		18.375	18.3852	0.0800468					62.4
	G06	SYBR	GAPDH	Unkn-26	C10-03		18.3107	18.3852	0.0800468					62.4
	G07	SYBR	GAPDH	Unkn-27	AT3-8		17.3161	17.3733	0.0556564					62.4
	G08	SYBR	GAPDH	Unkn-27	AT3-8		17.3765	17.3733	0.0556564					62.4
	G09	SYBR	GAPDH	Unkn-27	AT3-8		17.4273	17.3733	0.0556564					62.4
	G10	SYBR	GAPDH	Unkn-28	AT14-12		21.4989	21.6326	0.193648					62.4
	G11	SYBR	GAPDH	Unkn-28	AT14-12		21.5442	21.6326	0.193648					62.4
	G12	SYBR	GAPDH	Unkn-28	AT14-12		21.8547	21.6326	0.193648					62.4
	H01	SYBR	GAPDH	Unkn-29	WJ10-03		23.0978	22.8647	0.216032					62.4
	H02	SYBR	GAPDH	Unkn-29	WJ10-03		22.8254	22.8647	0.216032					62.4
	H03	SYBR	GAPDH	Unkn-29	WJ10-03		22.6711	22.8647	0.216032					62.4
	H04	SYBR	GAPDH	Unkn-30	BM1-1		23.2998	23.3047	0.026727					62.4
	H05	SYBR	GAPDH	Unkn-30	BM1-1		23.2807	23.3047	0.026727					62.4
	H06	SYBR	GAPDH	Unkn-30	BM1-1		23.3335	23.3047	0.026727					62.4
	H07	SYBR	GAPDH	Unkn-31	WJ11-12		17.6599	17.7	0.100909					62.4
	H08	SYBR	GAPDH	Unkn-31	WJ11-12		17.8148	17.7	0.100909					62.4
	H09	SYBR	GAPDH	Unkn-31	WJ11-12		17.6253	17.7	0.100909					62.4
	H10	SYBR	GAPDH	NTC			32.0549	32.0549	0				0	62.4
	H11	SYBR	GAPDH	NTC			31.0286	31.0286	0				0	62.4
	H12	SYBR	GAPDH	NTC			38.2817	38.2817	0				0	62.4

## Sheet: Run Information
File Name	LMX TH FOXA2 GAPDH CONTROLS .. S RUN2.pltd.pcrd
Created By User	admin
Notes
ID
Run Started	08/05/2020 09:52:16 UTC
Run Ended	08/05/2020 10:57:12 UTC
Sample Vol	10
Lid Temp	105
Protocol File Name	CONTROLS LMX TH FOX GAP.prcl
Plate Setup File Name	CONTROLS LMX1A TH FOXA2 GAPDH.pltd
Base Serial Number	CT016590
Optical Head Serial Number	785BR12279
CFX Maestro Version	4.0.2325.0418.
