# Supplementary material for: A comparative study of the capability of MSCs isolated from different human tissue sources to differentiate into neuronal stem cells and dopaminergic-like cells
Source: PeerJ. 2022 Mar 17;10:e13003. doi: 10.7717/peerj.13003 (PMC8944334; doi:10.7717/peerj.13003)
Supplement: Supplemental Information 4 [file peerj-10-13003-s004.xls]

## Sheet: 0
	Well	Fluor	Target	Content	Sample	Biological Set Name	Cq	Cq Mean	Cq Std. Dev	Starting Quantity (SQ)	Log Starting Quantity	SQ Mean	SQ Std. Dev	Set Point	Well Note
	A01	SYBR	NKX	Unkn-01	1		27.2325	27.1731	0.0581506					59.4
	A02	SYBR	NKX	Unkn-01	1		27.1706	27.1731	0.0581506					59.4
	A03	SYBR	NKX	Unkn-01	1		27.1163	27.1731	0.0581506					59.4
	A04	SYBR	NKX	Unkn-02	2		27.6417	27.5838	0.0527235					59.4
	A05	SYBR	NKX	Unkn-02	2		27.5709	27.5838	0.0527235					59.4
	A06	SYBR	NKX	Unkn-02	2		27.5386	27.5838	0.0527235					59.4
	A07	SYBR	NKX	Unkn-03	3		26.649	26.776	0.110017					59.4
	A08	SYBR	NKX	Unkn-03	3		26.8404	26.776	0.110017					59.4
	A09	SYBR	NKX	Unkn-03	3		26.8386	26.776	0.110017					59.4
	A10	SYBR	NKX	Unkn-04	4		26.3471	26.6495	0.327677					59.4
	A11	SYBR	NKX	Unkn-04	4		26.9977	26.6495	0.327677					59.4
	A12	SYBR	NKX	Unkn-04	4		26.6036	26.6495	0.327677					59.4
	B01	SYBR	NKX	Unkn-05	5		26.6945	26.4727	0.193368					59.4
	B02	SYBR	NKX	Unkn-05	5		26.3399	26.4727	0.193368					59.4
	B03	SYBR	NKX	Unkn-05	5		26.3836	26.4727	0.193368					59.4
	B04	SYBR	NKX	Unkn-06	6		28.5062	28.3246	0.216778					59.4
	B05	SYBR	NKX	Unkn-06	6		28.3831	28.3246	0.216778					59.4
	B06	SYBR	NKX	Unkn-06	6		28.0846	28.3246	0.216778					59.4
	B07	SYBR	NKX	Unkn-07	7		27.6138	27.406	0.179953					59.4
	B08	SYBR	NKX	Unkn-07	7		27.2998	27.406	0.179953					59.4
	B09	SYBR	NKX	Unkn-07	7		27.3045	27.406	0.179953					59.4
	B10	SYBR	NKX	Unkn-08	8		27.4481	27.6607	0.184726					59.4
	B11	SYBR	NKX	Unkn-08	8		27.7513	27.6607	0.184726					59.4
	B12	SYBR	NKX	Unkn-08	8		27.7826	27.6607	0.184726					59.4
	C01	SYBR	NKX	Unkn-09	9		25.494	25.6894	0.178639					59.4
	C02	SYBR	NKX	Unkn-09	9		25.8443	25.6894	0.178639					59.4
	C03	SYBR	NKX	Unkn-09	9		25.7299	25.6894	0.178639					59.4
	C04	SYBR	NKX	Unkn-10	10		25.8001	25.6747	0.116394					59.4
	C05	SYBR	NKX	Unkn-10	10		25.57	25.6747	0.116394					59.4
	C06	SYBR	NKX	Unkn-10	10		25.654	25.6747	0.116394					59.4
	C07	SYBR	NKX	Unkn-11	11		27.4913	27.467	0.17468					59.4
	C08	SYBR	NKX	Unkn-11	11		27.6282	27.467	0.17468					59.4
	C09	SYBR	NKX	Unkn-11	11		27.2814	27.467	0.17468					59.4
	C10	SYBR	NKX	Unkn-12	12		26.9876	27.185	0.172341					59.4
	C11	SYBR	NKX	Unkn-12	12		27.2618	27.185	0.172341					59.4
	C12	SYBR	NKX	Unkn-12	12		27.3056	27.185	0.172341					59.4
	D01	SYBR	NKX	Unkn-13	14		26.0849	26.0938	0.161659					59.4
	D02	SYBR	NKX	Unkn-13	14		26.2598	26.0938	0.161659					59.4
	D03	SYBR	NKX	Unkn-13	14		25.9368	26.0938	0.161659					59.4
	D04	SYBR	NKX	Unkn-14	15		27.3225	27.2889	0.159879					59.4
	D05	SYBR	NKX	Unkn-14	15		27.4294	27.2889	0.159879					59.4
	D06	SYBR	NKX	Unkn-14	15		27.115	27.2889	0.159879					59.4
	D07	SYBR	NKX	Unkn-15	16		27.5197	27.343	0.155578					59.4
	D08	SYBR	NKX	Unkn-15	16		27.2265	27.343	0.155578					59.4
	D09	SYBR	NKX	Unkn-15	16		27.2829	27.343	0.155578					59.4
	D10	SYBR	NKX	NTC	NTC			0	0			0	0	59.4
	D11	SYBR	NKX	NTC	NTC			0	0			0	0	59.4
	D12	SYBR	NKX	NTC	NTC			0	0			0	0	59.4
	E01	SYBR	NKX	Unkn-16	C1-04		34.293	34.266	0.16695					59.4
	E02	SYBR	NKX	Unkn-16	C1-04		34.0872	34.266	0.16695					59.4
	E03	SYBR	NKX	Unkn-16	C1-04		34.4178	34.266	0.16695					59.4
	E04	SYBR	NKX	Unkn-17	C10-03		34.269	34.7497	0.596973					59.4
	E05	SYBR	NKX	Unkn-17	C10-03		34.5621	34.7497	0.596973					59.4
	E06	SYBR	NKX	Unkn-17	C10-03		35.4179	34.7497	0.596973					59.4
	E07	SYBR	NKX	Unkn-18	AT3-8		33.6409	33.7905	0.196867					59.4
	E08	SYBR	NKX	Unkn-18	AT3-8		33.7171	33.7905	0.196867					59.4
	E09	SYBR	NKX	Unkn-18	AT3-8		34.0135	33.7905	0.196867					59.4
	E10	SYBR	NKX	Unkn-19	AT14-12		34.4506	33.6926	0.657078					59.4
	E11	SYBR	NKX	Unkn-19	AT14-12		33.3419	33.6926	0.657078					59.4
	E12	SYBR	NKX	Unkn-19	AT14-12		33.2852	33.6926	0.657078					59.4
	F01	SYBR	NKX	Unkn-20	WJ10-03		34.053	33.79	0.482425					59.4
	F02	SYBR	NKX	Unkn-20	WJ10-03		34.0838	33.79	0.482425					59.4
	F03	SYBR	NKX	Unkn-20	WJ10-03		33.2333	33.79	0.482425					59.4
	F04	SYBR	NKX	Unkn-21	BM1-1		35.325	35.0403	0.298211					59.4
	F05	SYBR	NKX	Unkn-21	BM1-1		35.0656	35.0403	0.298211					59.4
	F06	SYBR	NKX	Unkn-21	BM1-1		34.7302	35.0403	0.298211					59.4
	F07	SYBR	NKX	Unkn-22	WJ11-12		35.1682	34.5229	0.969141					59.4
	F08	SYBR	NKX	Unkn-22	WJ11-12		33.4085	34.5229	0.969141					59.4
	F09	SYBR	NKX	Unkn-22	WJ11-12		34.992	34.5229	0.969141					59.4

## Sheet: Run Information
File Name	NKX + CONTROLS .. S RUN 2.pcrd
Created By User	admin
Notes
ID
Run Started	08/05/2020 08:36:43 UTC
Run Ended	08/05/2020 09:43:49 UTC
Sample Vol	10
Lid Temp	105
Protocol File Name	CONTROLS NKX6.1.prcl
Plate Setup File Name	Quick Plate_96 wells_SYBR Only.pltd
Base Serial Number	CT016590
Optical Head Serial Number	785BR12279
CFX Maestro Version	4.0.2325.0418.
